# Supplementary material for: Non-salen coumarin Schiff base chiral fluorescent probe turn on circularly polarized luminescence by Mg2+ and Zn2+
Source: Royal Society of Chemistry journal article supplement (doi:10.1039/d1nj05817g), 2022-01-01
Supplement: d1nj05817g1.pdf [file d1nj05817g1.pdf]

## Supporting Information

### Non-Salen Coumarin Schiff Base Chiral Fluorescent Probe Turn on Circularly Polarized Luminescence by Mg<sup>2+</sup> and Zn<sup>2+</sup>

Fubin Fu, Xueyan Zhang, Shengquan Zhou, Wei Shi, Jiangmin Li, Jiajia Yu, Yanzhao

Rao, Lei Wu, Jing Cao\*

College of Chemistry, Xiangtan University, Xiangtan City, Hunan Province, 411105, China

Email: caojing8088@xtu.edu.cn

### Contents

|                                                         |         |
|---------------------------------------------------------|---------|
| Computational Studies.                                  | S2      |
| <sup>1</sup> H and <sup>13</sup> C Spectra of Compounds | S2–S6   |
| LC-MS spectrum of the compound L                        | S6      |
| photophysical properties of the probe                   | S7-S9   |
| IR spectra and DFT Optimized structure calculated       | S9      |
| Chiral enantiomer recognition FL Spectra of L1 and L2   | S10-S11 |

**Computational Studies.** The DFT calculations were performed by using the Gaussian 09 program<sup>4</sup> at the B3LYP 6-311(g) level.

### <sup>1</sup>H and <sup>13</sup>C Spectra of Compounds

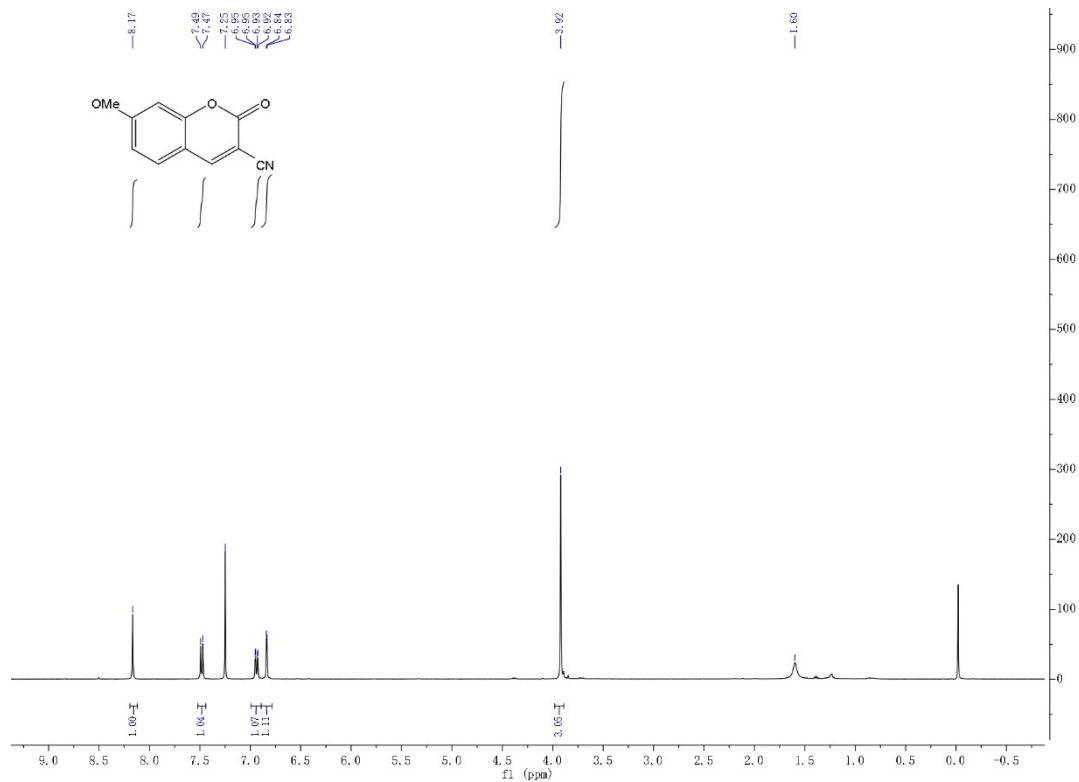

Figure S1. <sup>1</sup>H NMR spectrum of the compound 2a

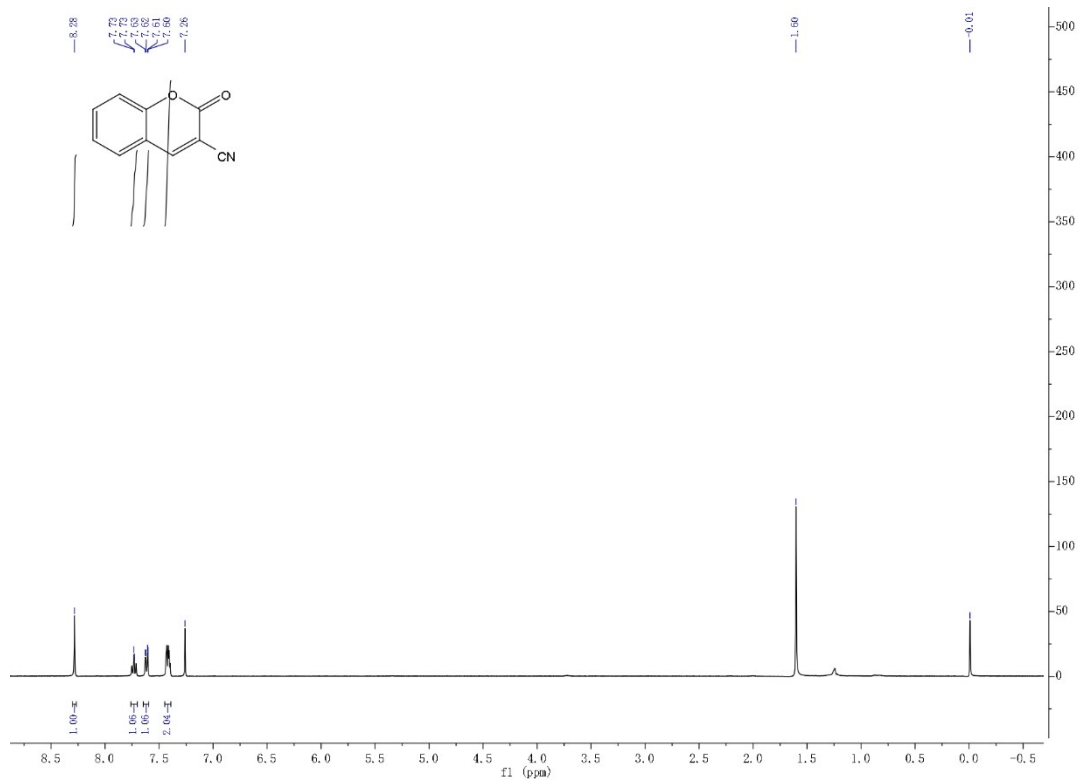

Figure S2 . <sup>1</sup>H NMR spectrum of the compound 2b

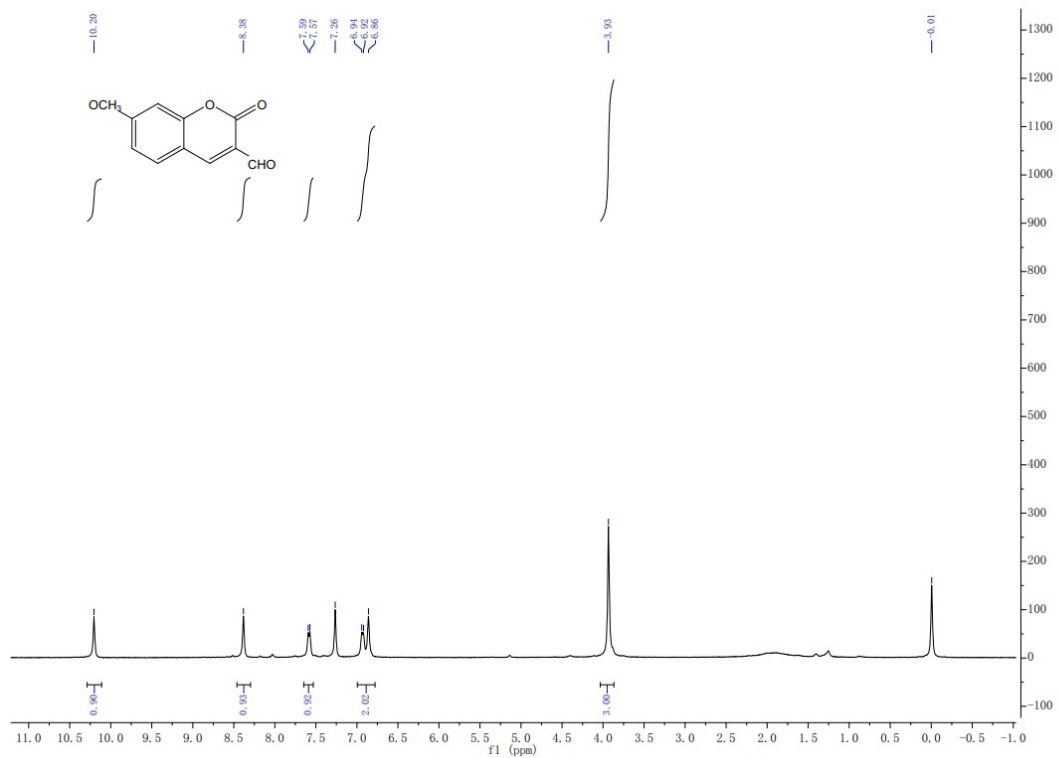

Figure S3 . <sup>1</sup>H NMR spectrum of the compound 3a

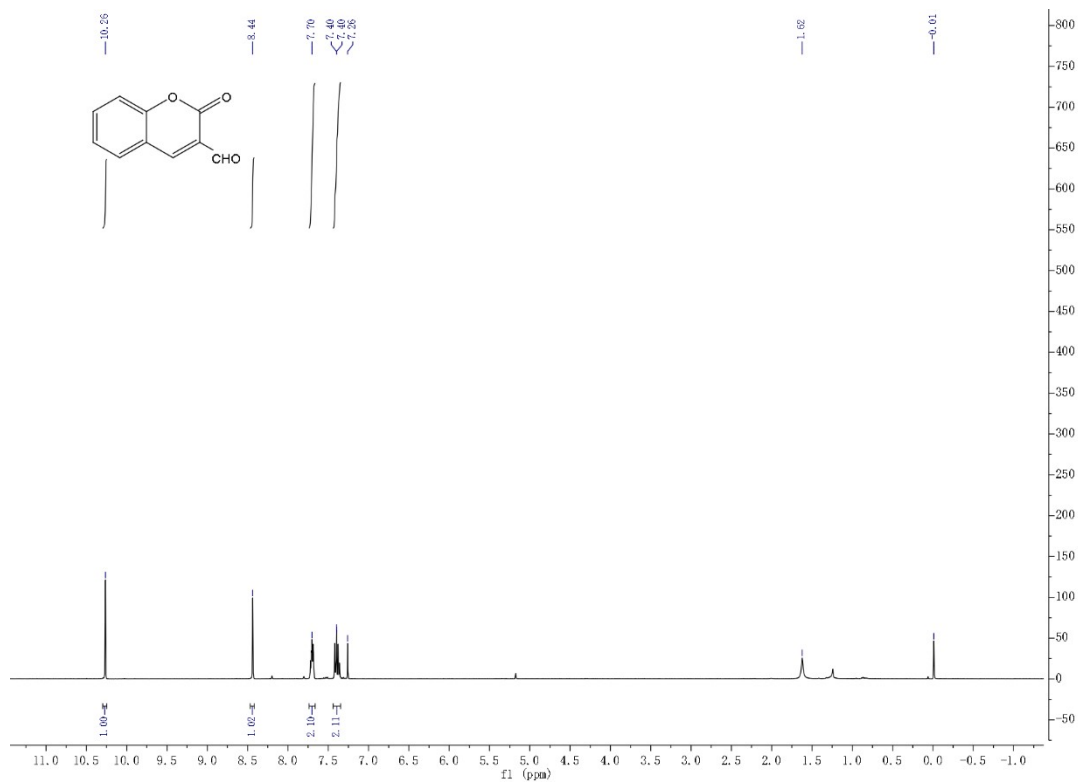

Figure S4 .  $^1\text{H NMR}$  spectrum of the compound 3b

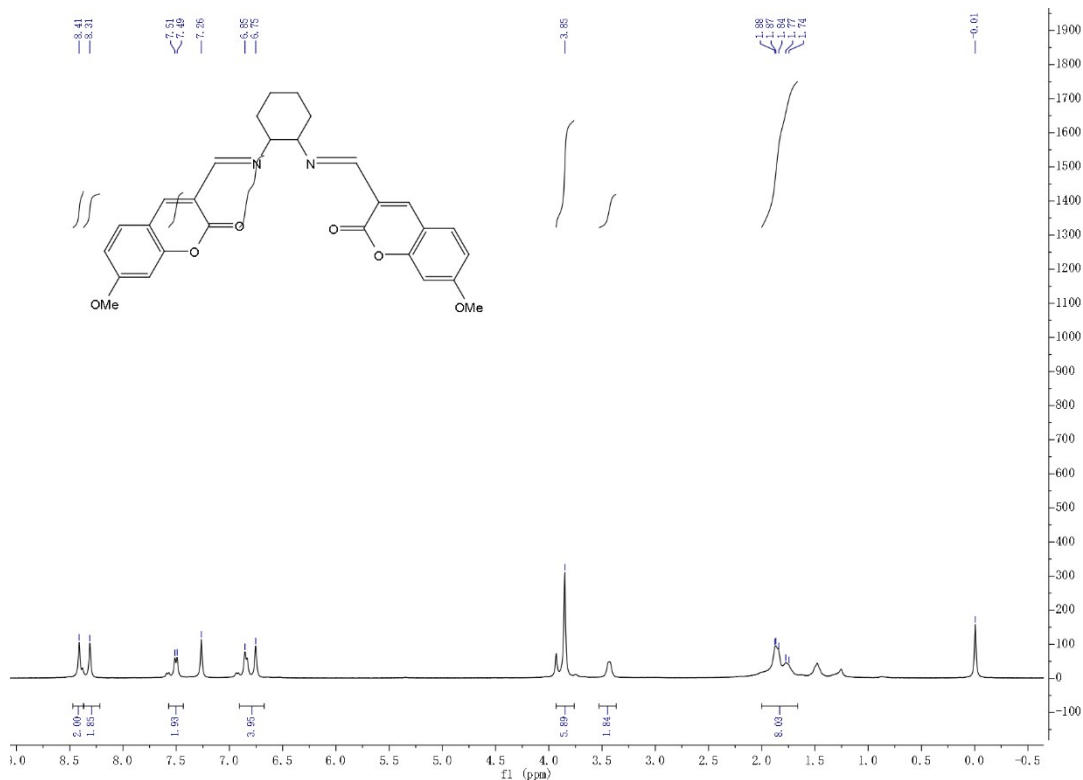

Figure S5 .  $^1\text{H NMR}$  spectrum of the compound L1

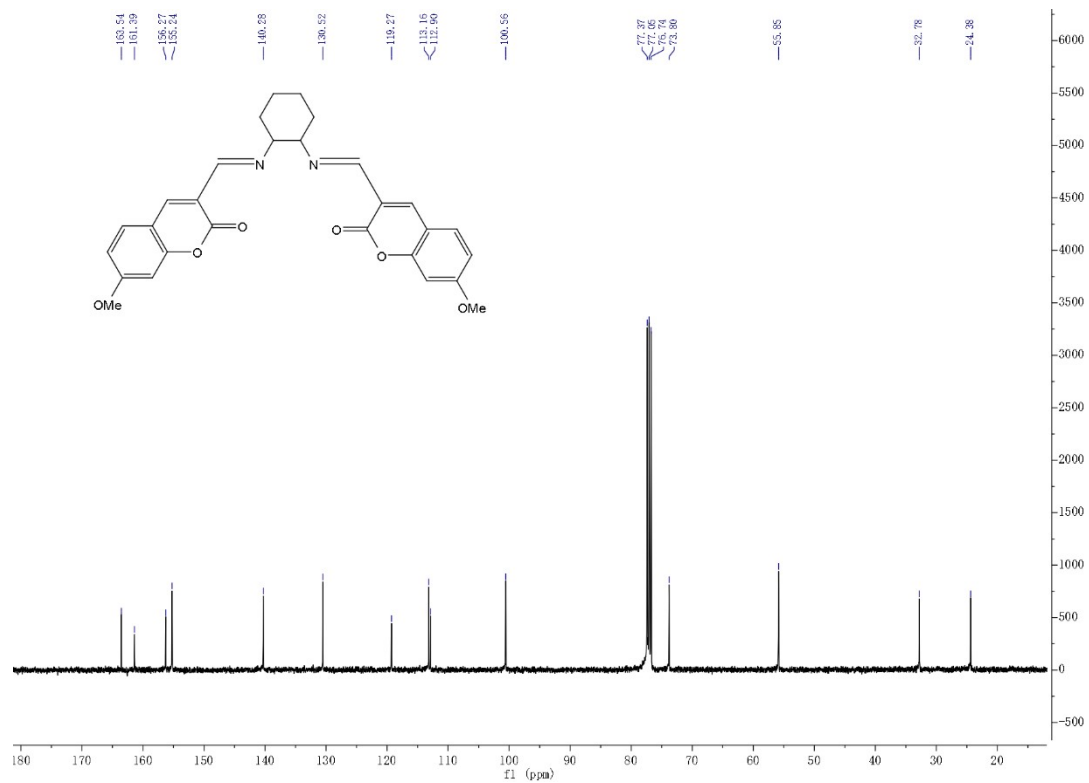

Figure S6 .  $^{13}\text{C}$  NMR spectrum of the compound L1

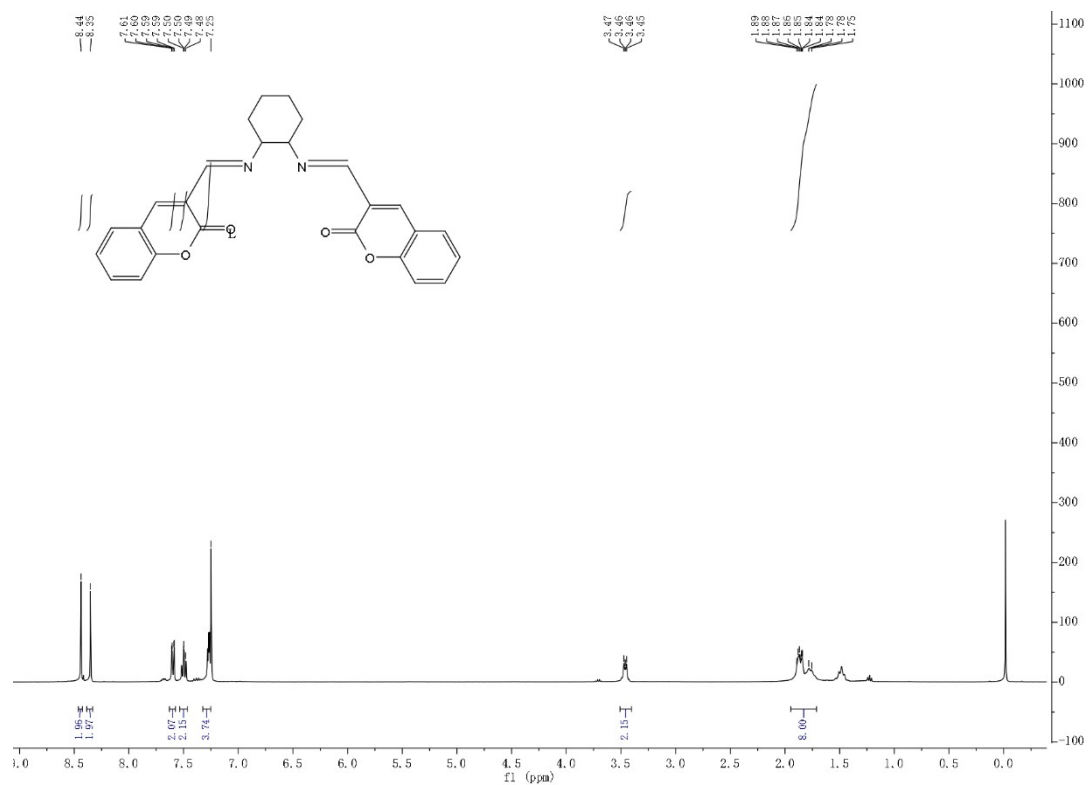

Figure S7 .  $^1\text{H}$  NMR spectrum of the compound L2

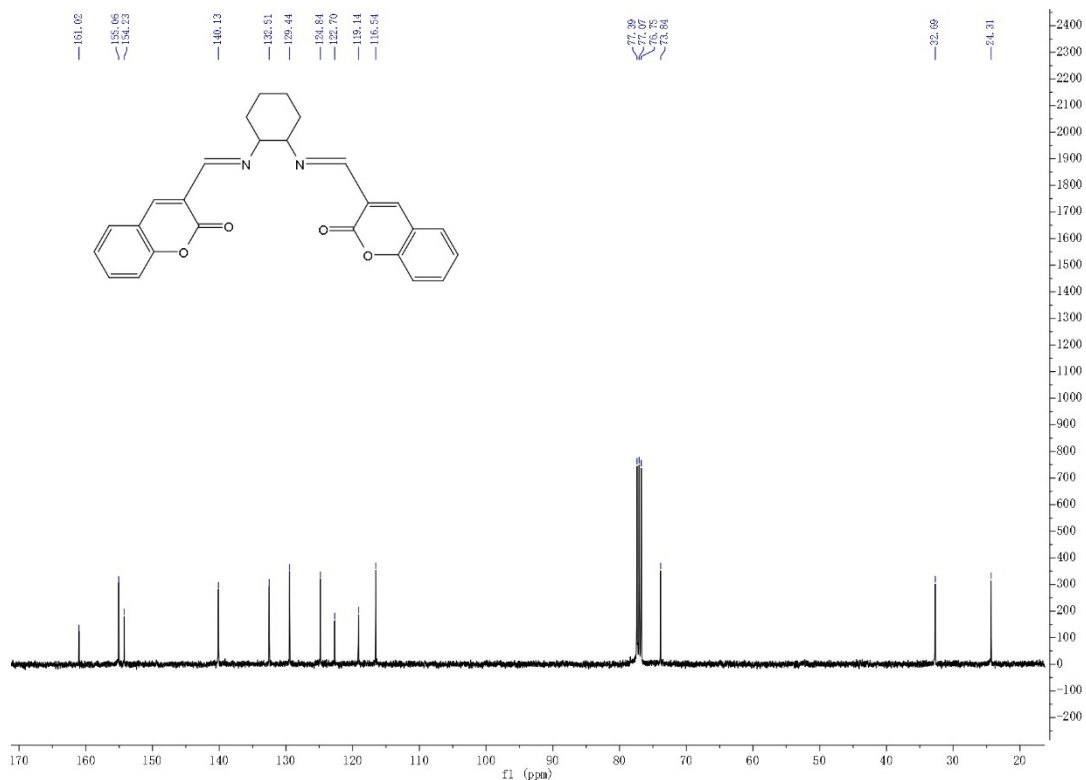

Figure S8.  $^{13}\text{C}$  NMR spectrum of the compound L2

## LC-MS spectrum of the compound L

### Sample Spectra

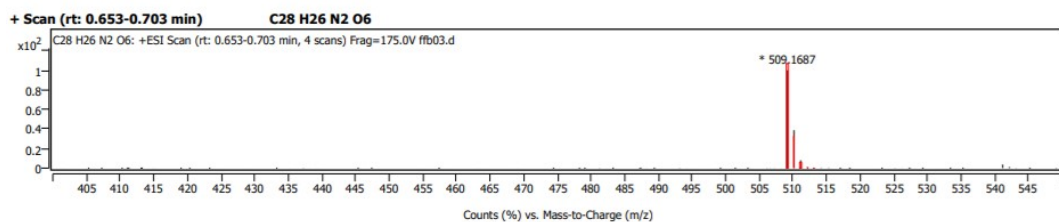

Figure S9. LC-MS spectrum of the compound L1

### Sample Spectra

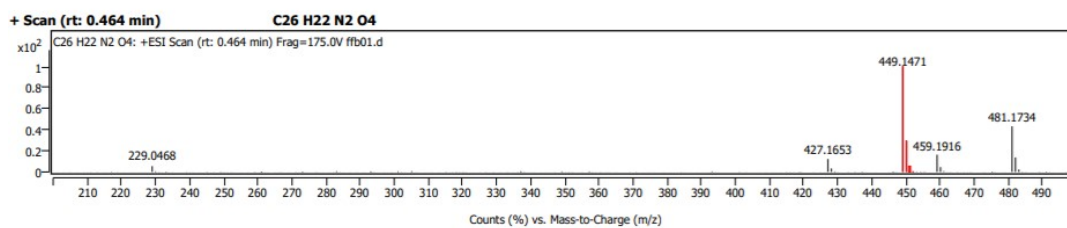

Figure S10. LC-MS spectrum of the compound L2

## photophysical properties of the probe

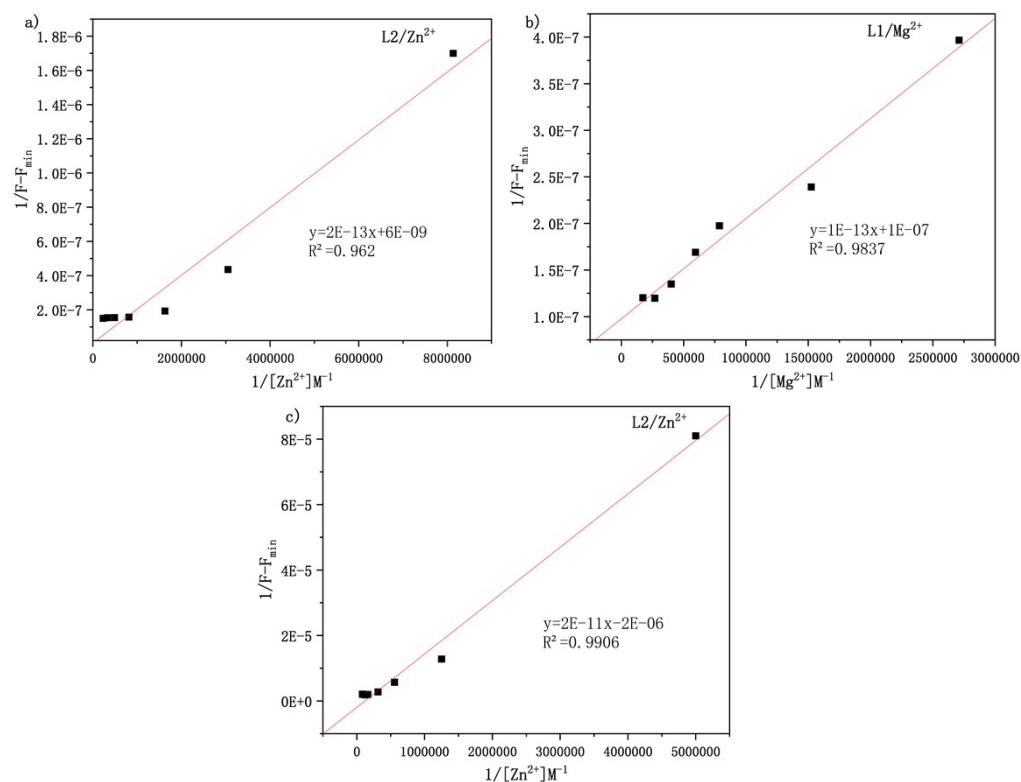

Figure S11. Benesi-Hildebrand curve of the emission changes for the complexation (a) L1/  $Zn^{2+}$ , (b) L1/  $Mg^{2+}$  and (c) L2/  $Zn^{2+}$ .

Table S1. The  $g_{abs}$  value of L1/ $Zn^{2+}$ , L1/ $Mg^{2+}$

| Substance           | Corresponding peak(nm) | $g_{abs}$ value |
|---------------------|------------------------|-----------------|
| (S,S)-L1            |                        | 1.1129E-03      |
| (R,R)-L1            | 368                    | -1.1124E-03     |
| (S,S)-L1/ $Zn^{2+}$ |                        | 9.7168E-04      |
| (R,R)-L1/ $Zn^{2+}$ | 382                    | -9.4900E-04     |
| (S,S)-L1/ $Mg^{2+}$ |                        | 1.1810E-03      |
| (R,R)-L1/ $Mg^{2+}$ | 377                    | -1.2202E-03     |
| (S,S)-L2            |                        | 2.0230E-03      |
| (R,R)-L2            | 345                    | -2.1840E-03     |
| (S,S)-L2/ $Zn^{2+}$ |                        | 2.4360E-03      |
| (R,R)-L2/ $Zn^{2+}$ | 345                    | -2.4740E-03     |

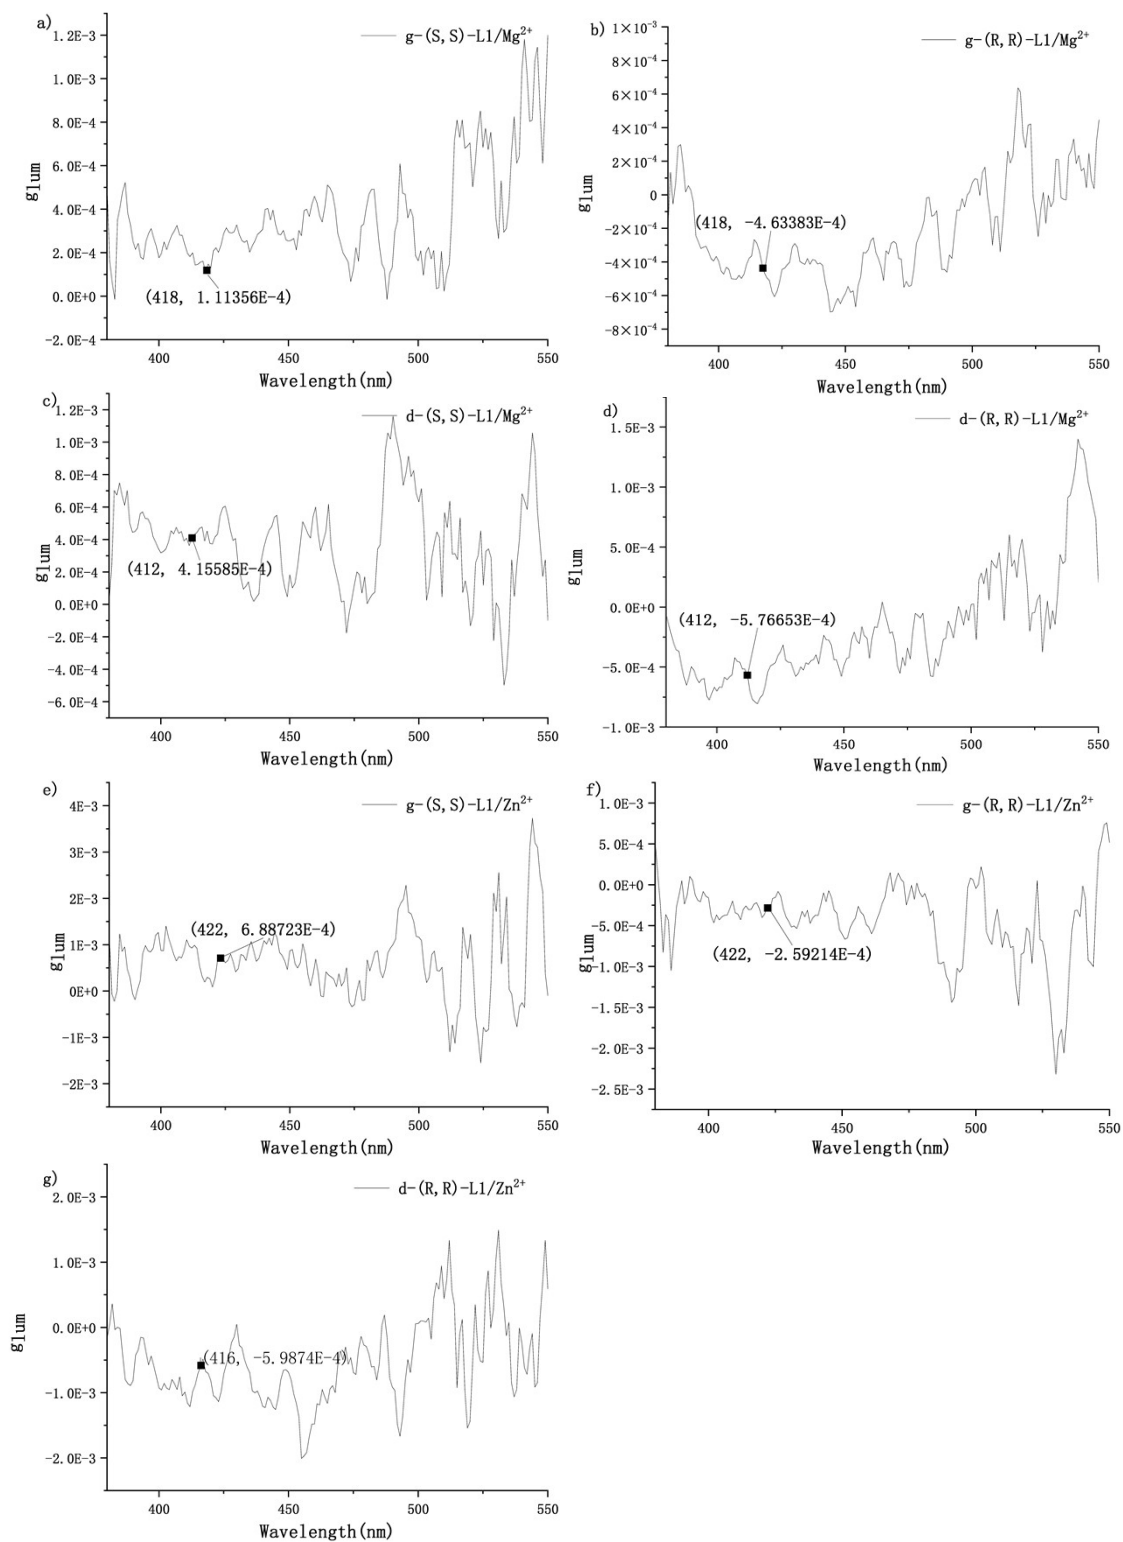

Figure S12.  $g_{lum}$  spectra of (a-d) (S,S)/(R,R)-L1/ $Mg^{2+}$  and (e-f) (S,S)/(R,R)-L1/ $Zn^{2+}$  at two order of magnitude concentration states of  $10^{-5}$  and  $10^{-4}$ . “g” indicates concentration of  $3 \times 10^{-4}$  M, “d” indicates concentration of  $2 \times 10^{-5}$  M,  $Ex_{(CPL)}=318$  nm .

Table S2. The  $g_{lum}$  value of L1/ $Zn^{2+}$ , L1/ $Mg^{2+}$



| Substance                      | the highest peak in synchronization (nm) | $g_{lum}$ value           |
|--------------------------------|------------------------------------------|---------------------------|
| (a)g-(S,S)-L1/Mg <sup>2+</sup> | 418                                      | $1.11356 \times 10^{-4}$  |
| (b)g-(R,R)-L1/Mg <sup>2+</sup> |                                          | $-4.63661 \times 10^{-4}$ |
| (c)d-(S,S)-L1/Mg <sup>2+</sup> |                                          | $4.15585 \times 10^{-4}$  |
| (d)d-(R,R)-L1/Mg <sup>2+</sup> | 412                                      | $-5.76653 \times 10^{-4}$ |
| (e)g-(S,S)-L1/Zn <sup>2+</sup> |                                          | $6.88723 \times 10^{-4}$  |
| (f)g-(R,R)-L1/Zn <sup>2+</sup> | 422                                      | $-2.59214 \times 10^{-4}$ |
| d-(S,S)-L1/Zn <sup>2+</sup>    |                                          | -                         |
| (g)d-(R,R)-L1/Zn <sup>2+</sup> |                                          | $-5.9874 \times 10^{-4}$  |

### IR spectra and DFT Optimized structure calculated

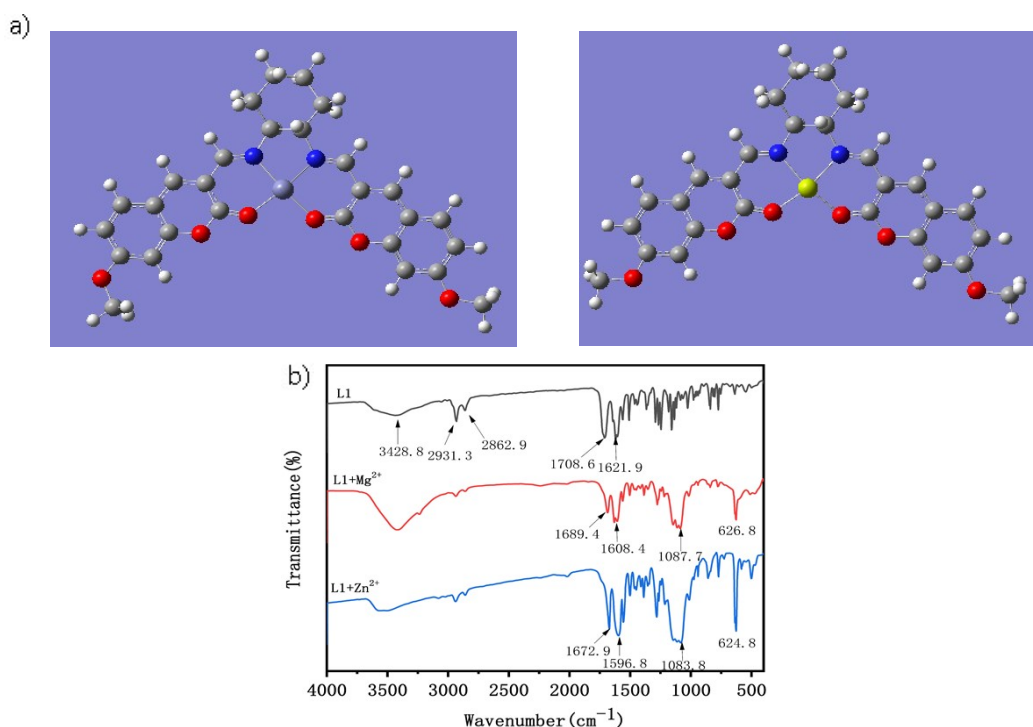

Figure S13. (a) optimized structure calculated at the DFT-B3LYP 6-311g for L1/Zn<sup>2+</sup> (left) and L1/Mg<sup>2+</sup> (right);

(b) IR spectra of L1, L1/Zn<sup>2+</sup> and L1/Mg<sup>2+</sup>.

### Chiral enantiomer recognition FL Spectra of L1 and L2

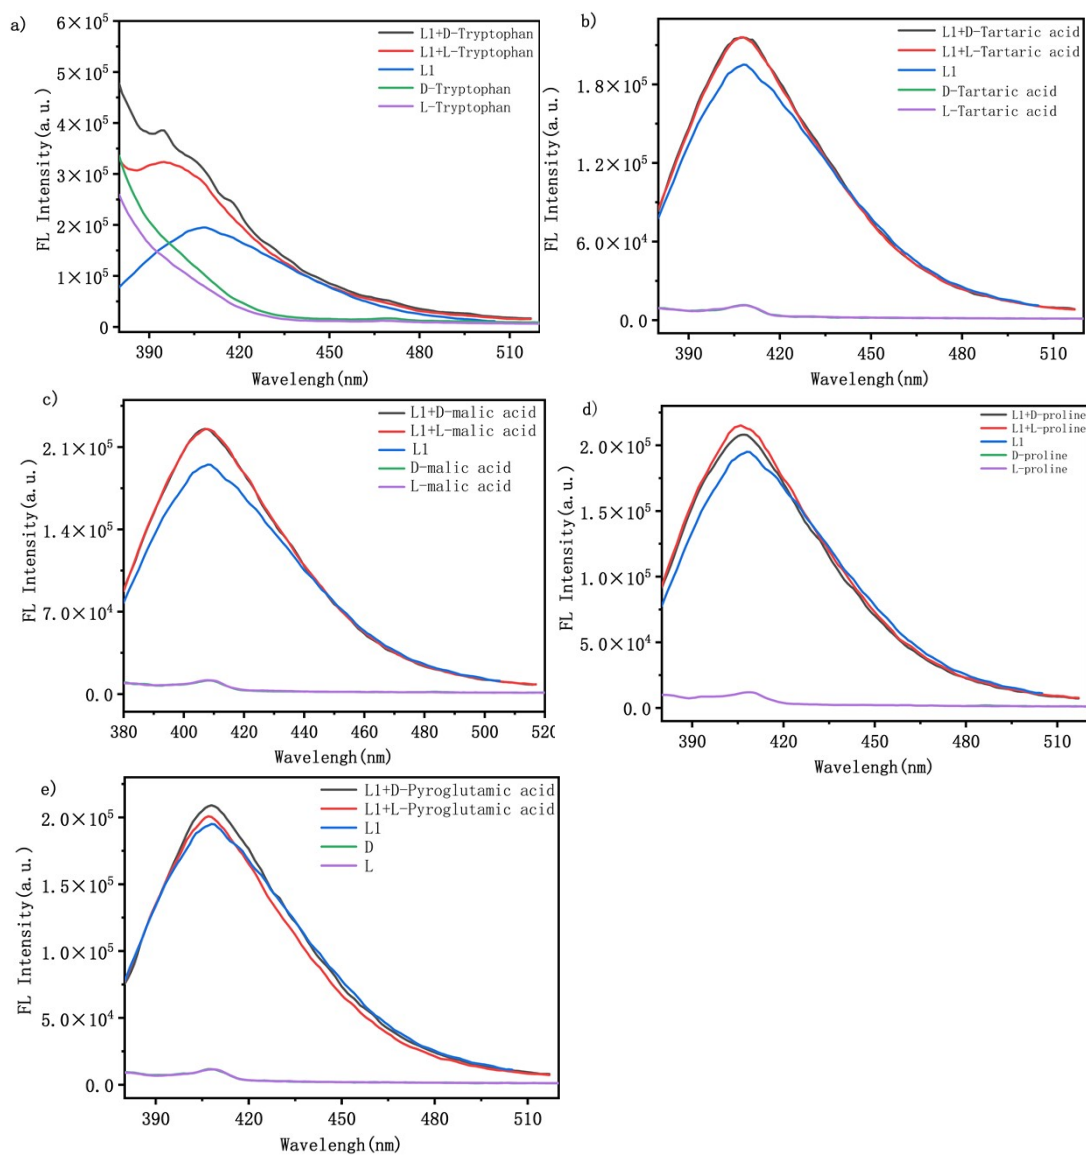

Figure S14. Fluorescence emission spectra of seven chiral enantiomers added to the probe L1 separately ( $\lambda_{\text{exc}}=365\text{nm}, \lambda_{\text{em}}=408\text{ nm}$ ; Slit width: EX=5 nm, EM=5 nm). (a): (D)- and (L)-tryptophan; (b): (D)- and (L)-tartaric acid; (c): (D)- and (L)-malic acid; (d): (D)- and (L)-proline; (e): (D)- and (L)-pyroglutamic acid.

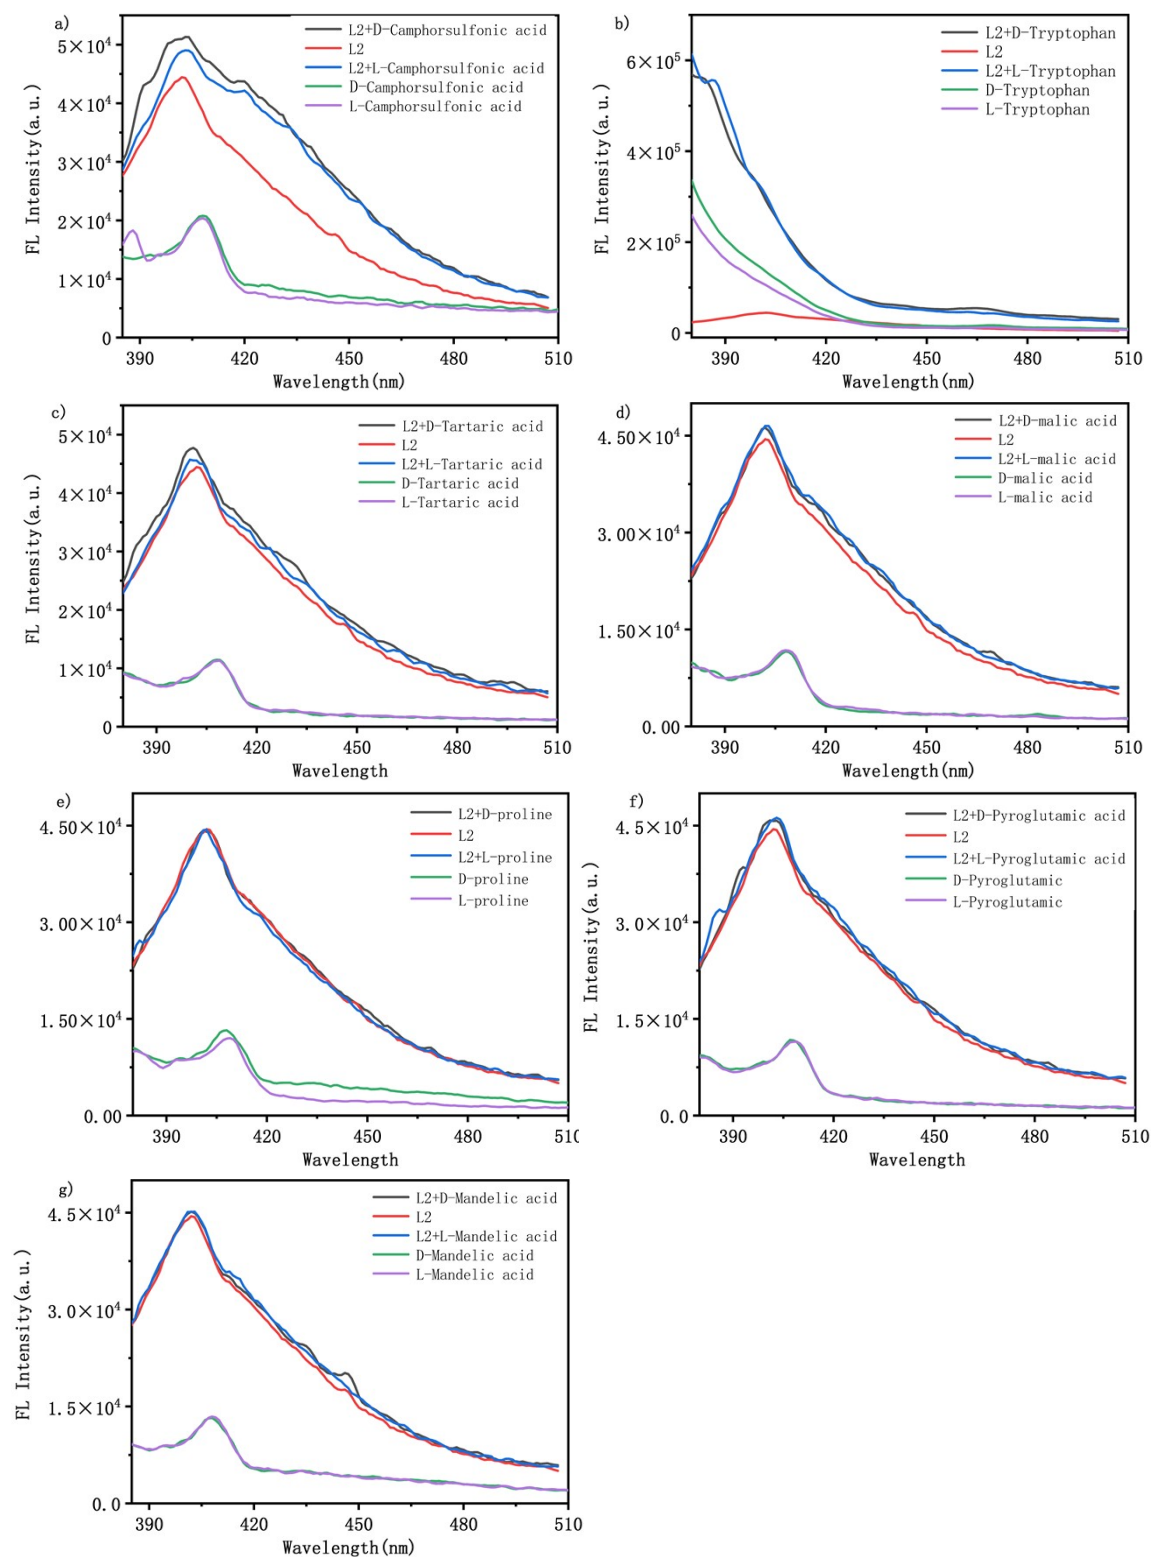

Figure S15. Fluorescence emission spectra of seven chiral enantiomers added to the probe L2 separately ( $\lambda_{\text{ex}}=365\text{nm}$ ,  $\lambda_{\text{em}}=408\text{ nm}$ ; Slit width: EX=5 nm, EM=5 nm). (a): (D)- and (L)-camphorsulfonic acid; (b): (D)- and (L)-tryptophan; (c): (D)- and (L)-tartaric acid; (d): (D)- and (L)-malic acid; (e): (D)- and (L)-proline; (f): (D)- and (L)-pyroglutamic acid; (g): (D)- and (L)-mandelic acid.
